# Supplementary material for: The Microbiome and Metabolome of Preterm Infant Stool Are Personalized and Not Driven by Health Outcomes, Including Necrotizing Enterocolitis and Late-Onset Sepsis
Source: PubMed Central journal article supplement (PMC5990886; doi:10.1128/msphere.00104-18), 2018-06-06
Supplement: sph003182562st2.pdf [file sph003182562st2.pdf]

| Metabolite                     | Category              |
|--------------------------------|-----------------------|
| 2-ketoisocaproic acid          | amino acid metabolism |
| 2-picolinic acid               | amino acid metabolism |
| 3,4-dihydroxyphenylacetic acid | amino acid metabolism |
| 3-phenyllactic acid            | amino acid metabolism |
| 4-aminobutyric acid            | amino acid metabolism |
| 4-hydroxybenzoate              | amino acid metabolism |
| 4-hydroxyphenylacetic acid     | amino acid metabolism |
| 5-aminovaleric acid            | amino acid metabolism |
| alanine                        | amino acid metabolism |
| alanine-alanine                | amino acid metabolism |
| asparagine                     | amino acid metabolism |
| aspartic acid                  | amino acid metabolism |
| beta-alanine                   | amino acid metabolism |
| cysteine                       | amino acid metabolism |
| cystine                        | amino acid metabolism |
| glutamine                      | amino acid metabolism |
| glutaric acid                  | amino acid metabolism |
| glycine                        | amino acid metabolism |
| histidine                      | amino acid metabolism |
| homocystine                    | amino acid metabolism |
| homoserine                     | amino acid metabolism |
| indole-3-lactate               | amino acid metabolism |
| isoleucine                     | amino acid metabolism |
| leucine                        | amino acid metabolism |
| lysine                         | amino acid metabolism |
| methionine                     | amino acid metabolism |
| methionine sulfoxide           | amino acid metabolism |
| N-acetylaspatic acid           | amino acid metabolism |
| n-acetylglutamate              | amino acid metabolism |
| N-acetylornithine              | amino acid metabolism |
| N-acetylputrescine             | amino acid metabolism |
| N-methylalanine                | amino acid metabolism |
| O-acetylserine                 | amino acid metabolism |
| ornithine                      | amino acid metabolism |
| phenol                         | amino acid metabolism |
| phenylacetic acid              | amino acid metabolism |
| phenylalanine                  | amino acid metabolism |
| phenylethylamine               | amino acid metabolism |
| pipecolic acid                 | amino acid metabolism |
| proline                        | amino acid metabolism |

|                            |                       |
|----------------------------|-----------------------|
| putrescine                 | amino acid metabolism |
| pyrrole-2-carboxylic acid  | amino acid metabolism |
| serine                     | amino acid metabolism |
| shikimic acid              | amino acid metabolism |
| threonine                  | amino acid metabolism |
| trans-4-hydroxyproline     | amino acid metabolism |
| tryptophan                 | amino acid metabolism |
| tyramine                   | amino acid metabolism |
| tyrosine                   | amino acid metabolism |
| urea                       | amino acid metabolism |
| urocanic acid              | amino acid metabolism |
| valine                     | amino acid metabolism |
| N-acetyl-D-galactosamine   | amino sugar           |
| n-acetyl-d-hexosamine      | amino sugar           |
| chenodeoxycholic acid      | bile acid             |
| cholic acid                | bile acid             |
| taurine                    | bile acid             |
| aconitic acid              | central metabolism    |
| alpha-ketoglutarate        | central metabolism    |
| citramalic acid            | central metabolism    |
| citric acid                | central metabolism    |
| dihydroxyacetone           | central metabolism    |
| fumaric acid               | central metabolism    |
| glucose-6-phosphate        | central metabolism    |
| glyceric acid              | central metabolism    |
| isocitric acid             | central metabolism    |
| malic acid                 | central metabolism    |
| oxalic acid                | central metabolism    |
| pyrophosphate              | central metabolism    |
| pyruvic acid               | central metabolism    |
| succinic acid              | central metabolism    |
| sulfuric acid              | central metabolism    |
| 2-hydroxybutanoic acid     | fatty acid            |
| arachidic acid             | fatty acid            |
| arachidonic acid           | fatty acid            |
| behenic acid               | fatty acid            |
| capric acid                | fatty acid            |
| cerotinic aci              | fatty acid            |
| elaidic acid               | fatty acid            |
| heptadecanoic acid         | fatty acid            |
| isoheptadecanoic acid NIST | fatty acid            |

|                                    |                       |
|------------------------------------|-----------------------|
| lauric acid                        | fatty acid            |
| lignoceric acid                    | fatty acid            |
| linoleic acid                      | fatty acid            |
| myristic acid                      | fatty acid            |
| nonadecanoic acid                  | fatty acid            |
| oleic acid                         | fatty acid            |
| palmitic acid                      | fatty acid            |
| pentadecanoic acid                 | fatty acid            |
| stearic acid                       | fatty acid            |
| butane-2,3-diol NIST               | fermentation product  |
| lactic acid                        | fermentation product  |
| 1-monoheptadecanoyl glyceride NIST | lipid metabolism      |
| 1-monoolein                        | lipid metabolism      |
| 1-monopalmitin                     | lipid metabolism      |
| 1-monostearin                      | lipid metabolism      |
| 2-monoolein                        | lipid metabolism      |
| 2-monopalmitin                     | lipid metabolism      |
| dodecanol                          | lipid metabolism      |
| ethanolamine                       | lipid metabolism      |
| glycerol-alpha-phosphate           | lipid metabolism      |
| monomyristin                       | lipid metabolism      |
| phosphoethanolamine                | lipid metabolism      |
| phytol                             | lipid metabolism      |
| propane-1,3-diol NIST              | lipid metabolism      |
| 3-aminoisobutyric acid             | nucleotide metabolism |
| 3-hydroxypropionic acid            | nucleotide metabolism |
| 5,6-dihydrouracil                  | nucleotide metabolism |
| 7-methylguanine NIST               | nucleotide metabolism |
| adenine                            | nucleotide metabolism |
| adenosine                          | nucleotide metabolism |
| adenosine-5-monophosphate          | nucleotide metabolism |
| cytosin                            | nucleotide metabolism |
| guanosine                          | nucleotide metabolism |
| inosine                            | nucleotide metabolism |
| orotic acid                        | nucleotide metabolism |
| pseudo uridine                     | nucleotide metabolism |
| ribose                             | nucleotide metabolism |
| thymidine                          | nucleotide metabolism |
| thymine                            | nucleotide metabolism |
| uracil                             | nucleotide metabolism |
| uric acid                          | nucleotide metabolism |
| uridine                            | nucleotide metabolism |

|                                 |                       |
|---------------------------------|-----------------------|
| xanthine                        | nucleotide metabolism |
| xanthosine                      | nucleotide metabolism |
| 2,3-dihydroxybutanoic acid NIST | organic acid          |
| 2-deoxytetrionic acid           | organic acid          |
| 2-deoxytetrionic acid NIST      | organic acid          |
| 2-hydroxyglutaric acid          | organic acid          |
| 2-hydroxyhexanoic acid          | organic acid          |
| 2-hydroxyvaleric acid           | organic acid          |
| 3-hydroxy-3-methylglutaric acid | organic acid          |
| 3-hydroxybutyric acid           | organic acid          |
| adipic acid                     | organic acid          |
| azelaic acid                    | organic acid          |
| benzoic acid                    | organic acid          |
| digalacturonic acid             | organic acid          |
| erythronic acid lactone         | organic acid          |
| glycolic acid                   | organic acid          |
| hexaric acid                    | organic acid          |
| maleic acid                     | organic acid          |
| syringic acid                   | organic acid          |
| tartaric acid                   | organic acid          |
| cholesterol                     | sterol                |
| dihydrocholesterol              | sterol                |
| squalene                        | sterol                |
| stigmasterol                    | sterol                |
| beta-gentiobiose                | sugar                 |
| cellobiose                      | sugar                 |
| fructose                        | sugar                 |
| glucose                         | sugar                 |
| glycerol-3-galactoside          | sugar                 |
| levoglucosan                    | sugar                 |
| lyxose                          | sugar                 |
| maltose                         | sugar                 |
| maltotriose                     | sugar                 |
| mannose                         | sugar                 |
| N-acetyl-D-mannosamine          | sugar                 |
| raffinose                       | sugar                 |
| tagatose                        | sugar                 |
| trehalose                       | sugar                 |
| xylose                          | sugar                 |
| xylulose NIST                   | sugar                 |
| galacturonic acid               | sugar acid            |
| gluconic acid                   | sugar acid            |

|                                                      |                    |
|------------------------------------------------------|--------------------|
| gluconic acid lactone                                | sugar acid         |
| lactobionic acid                                     | sugar acid         |
| ribonic acid                                         | sugar acid         |
| saccharic acid                                       | sugar acid         |
| threonic acid                                        | sugar acid         |
| UDP-glucuronic acid                                  | sugar acid         |
| xylonic acid                                         | sugar acid         |
| erythritol                                           | sugar alcohol      |
| erythrose                                            | sugar alcohol      |
| fucose                                               | sugar alcohol      |
| galactinol                                           | sugar alcohol      |
| hexitol                                              | sugar alcohol      |
| isothreitol                                          | sugar alcohol      |
| lactitol                                             | sugar alcohol      |
| lyxitol                                              | sugar alcohol      |
| mannitol                                             | sugar alcohol      |
| palatinitol                                          | sugar alcohol      |
| xylitol                                              | sugar alcohol      |
| 4-pyridoxic acid                                     | vitamin metabolism |
| delta-tocopherol NIST                                | vitamin metabolism |
| hexuronic acid1                                      | vitamin metabolism |
| nicotinamide                                         | vitamin metabolism |
| nicotinic acid                                       | vitamin metabolism |
| tocopherol alpha-                                    | vitamin metabolism |
| tocopherol beta NIST                                 | vitamin metabolism |
| tocopherol gamma-                                    | vitamin metabolism |
| 1,2-anhydro-myo-inositol NIST                        | xother             |
| 2-deoxypentitol NIST                                 | xother             |
| 2-hydroxypyrazinyl-2-propenoic acid ethyl ester NIST | xother             |
| 4-hydroxymandelic acid                               | xother             |
| 5-hydroxymethyl-2-furoic acid NIST                   | xother             |
| 6-hydroxynicotinic acid                              | xother             |
| acetophenone NIST                                    | xother             |
| allantoic acid                                       | xother             |
| alloxanoic acid NIST                                 | xother             |
| aminomalonate                                        | xother             |
| beta-mannosylglycerate                               | xother             |
| butyrolactam NIST                                    | xother             |
| caffeine                                             | xother             |
| conduritol-beta-epoxide                              | xother             |
| creatinine                                           | xother             |
| docosahexaenoic acid                                 | xother             |

|                                      |        |
|--------------------------------------|--------|
| epsilon-caprolactam                  | xother |
| hexadecylglycerol NIST               | xother |
| hydroxycarbamate NIST                | xother |
| hydroxylamine                        | xother |
| indole-3-acetate                     | xother |
| inositol-4-monophosphate             | xother |
| isohexonic acid                      | xother |
| isothreonic acid                     | xother |
| maleimide                            | xother |
| malonic acid                         | xother |
| methyl O-D-galactopyranoside         | xother |
| methyltetrahydrophenanthrene1 NIST   | xother |
| parabanic acid NIST                  | xother |
| sebacic acid, di(2-octyl) ester NIST | xother |
| tyrosol                              | xother |
| xylonolactone NIST                   | xother |
| zymosterol                           | xother |
